# Supplementary material for: High temperature gas sensing performances of silicon carbide nanosheets with an n–p conductivity transition
Source: Royal Society of Chemistry journal article supplement (doi:10.1039/c8ra02164c), 2018-01-01
Supplement: c8ra02164c1.pdf [file c8ra02164c1.pdf]

**Supporting Information**

**High temperature gas sensing performances of silicon  
carbide nanosheets with an n-p conductivity  
transition**

Lian Sun<sup>a</sup>, Cheng Han<sup>a</sup>, Nan Wu<sup>a</sup>, Bing Wang<sup>a\*</sup>, Yingde Wang<sup>a\*</sup>

*<sup>a</sup>Science and Technology on Advanced Ceramic Fibers and Composites Laboratory,*

*National University of Defense Technology, Changsha 410073, China*

**\*Corresponding Author:** Tel.: +86 731 84574196. E-mail: [cfwb01@163.com](mailto:cfwb01@163.com) (B. Wang)  
[wangyingde@nudt.edu.cn](mailto:wangyingde@nudt.edu.cn) (Y. D. Wang)

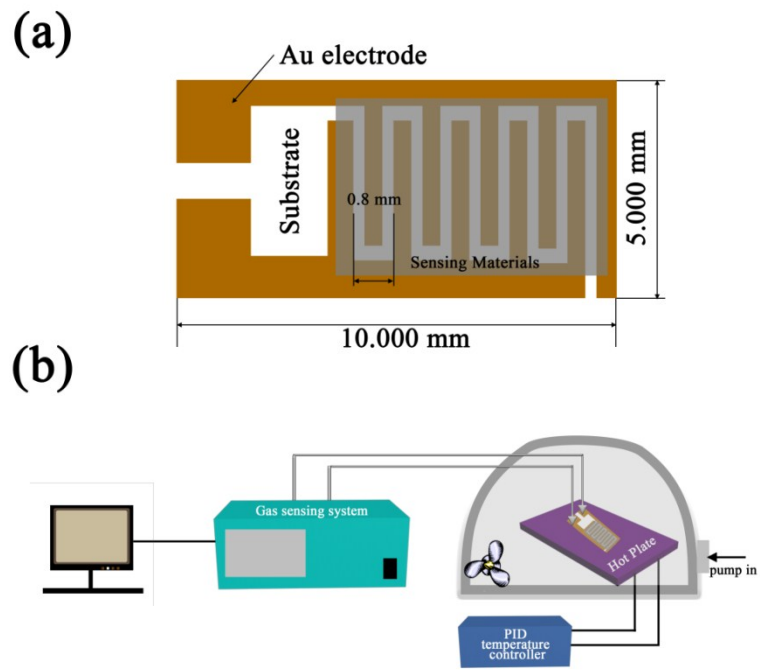

**Figure S1** Schematic illustration of (a) gas sensing device after spin-coated and (b) testing system.

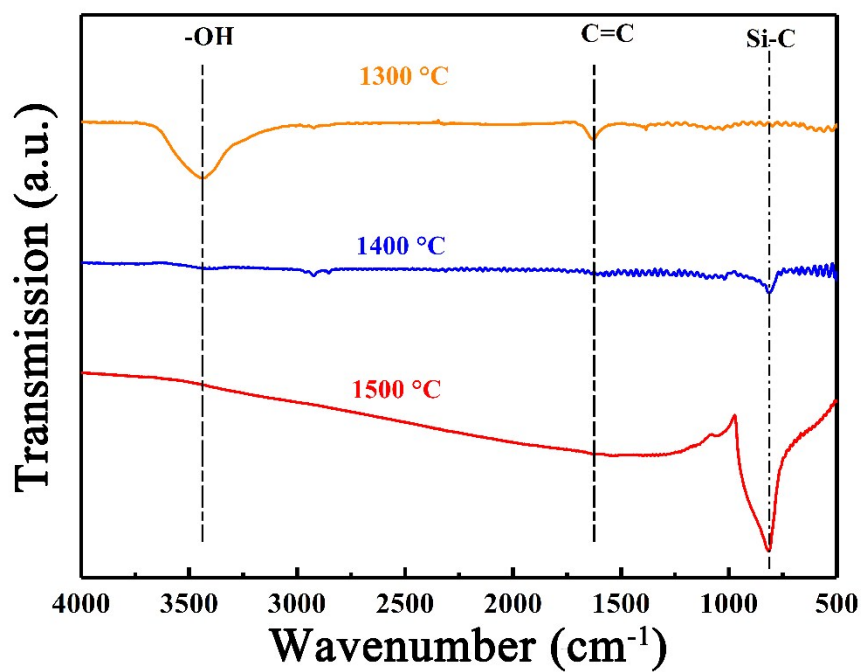

**Figure S2** FT-IR spectra of SiC NSs heated at different temperatures for 2 h.

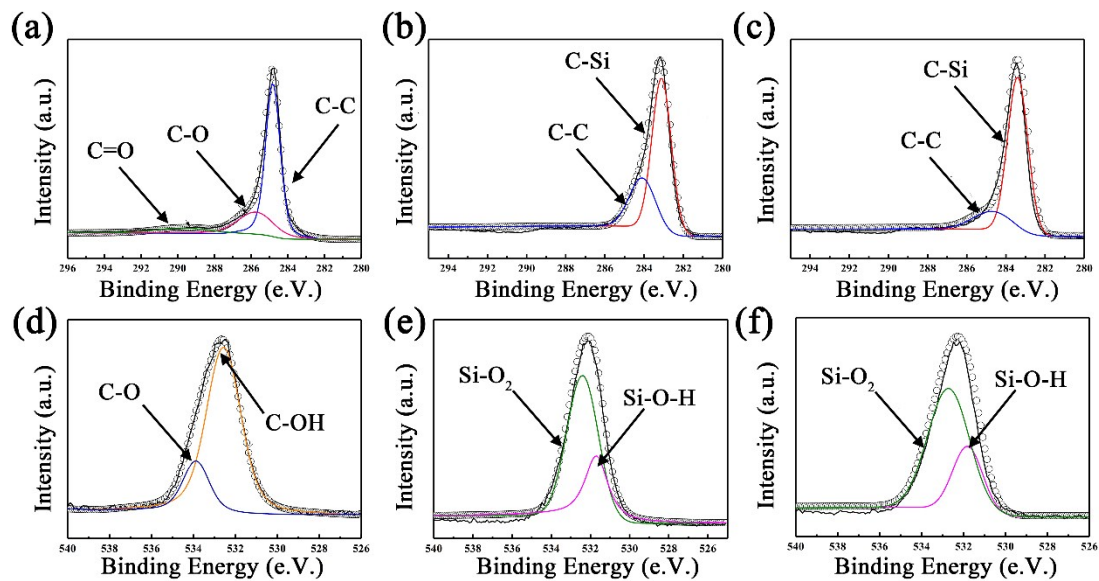

**Figure S3** High resolution (a)-(c)  $C_{1s}$  and (d)-(f)  $O_{1s}$  XPS peaks of SiC NSs heated for 2 h at (a) (d) 1300 °C, (b) (e) 1400 °C and (c) (f) 1500 °C.

The high-resolution  $C_{1s}$  peaks of SiC-1400<sub>2.0</sub> and SiC-1500<sub>2.0</sub> give peaks at 283.1 and 284.6 eV, which is ascribed to C-Si and C-C bond, respectively [1]. On the contrast, the  $C_{1s}$  high resolution spectrum of SiC-1300<sub>2.0</sub> mainly consists of C-C (284.6 eV), C-O (285.8 eV) and C=O (289.6 eV) bond, implying that the main composition of this sample is carbon phase [2-3]. Correspondingly, the deconvolution of  $O_{1s}$  peak gives Si-O<sub>2</sub> and Si-O-H bond (532.7 and 531.8 eV, respectively) above 1400 °C, while only C-OH (532.4 eV) and C-O (533.9 eV) bond can be found in the  $O_{1s}$  peak of SiC-1300<sub>2</sub> [4].

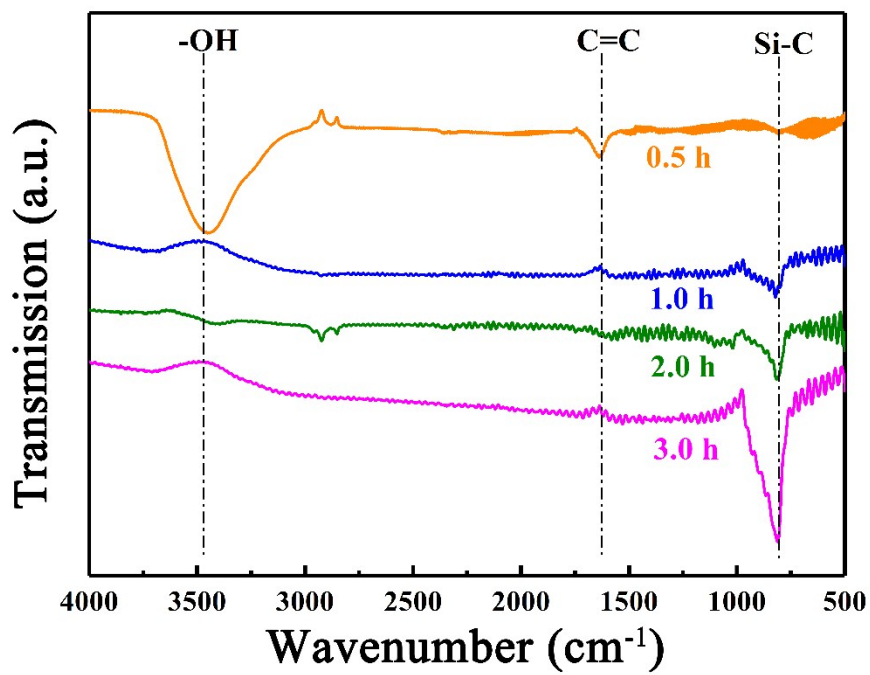

**Figure S4** FT-IR spectra of SiC NSs heated at 1400 °C for different time.

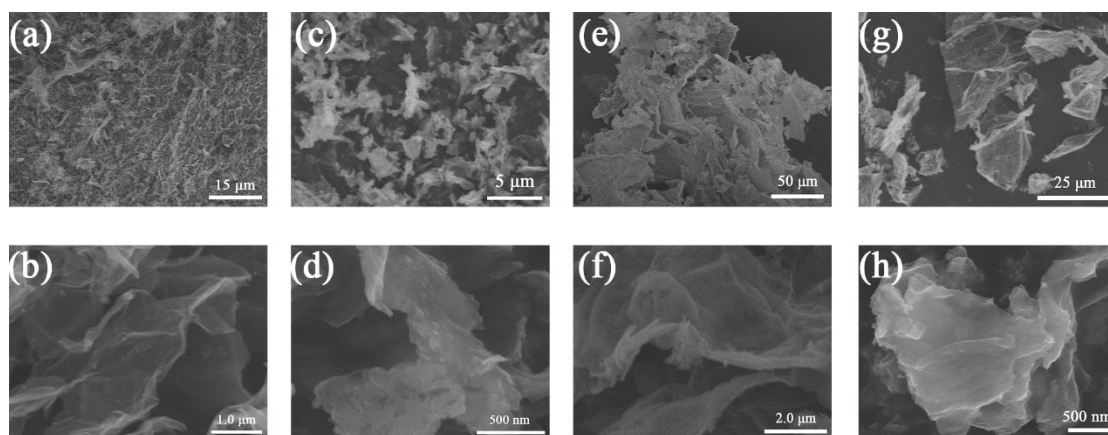

**Figure S5** SEM images of SiC NSs synthesis under 1400 °C for (a) (b) 0.5 h, (c) (d) 1.0 h, (e) (f) 2.0 h, (g) (h) 3.0 h.

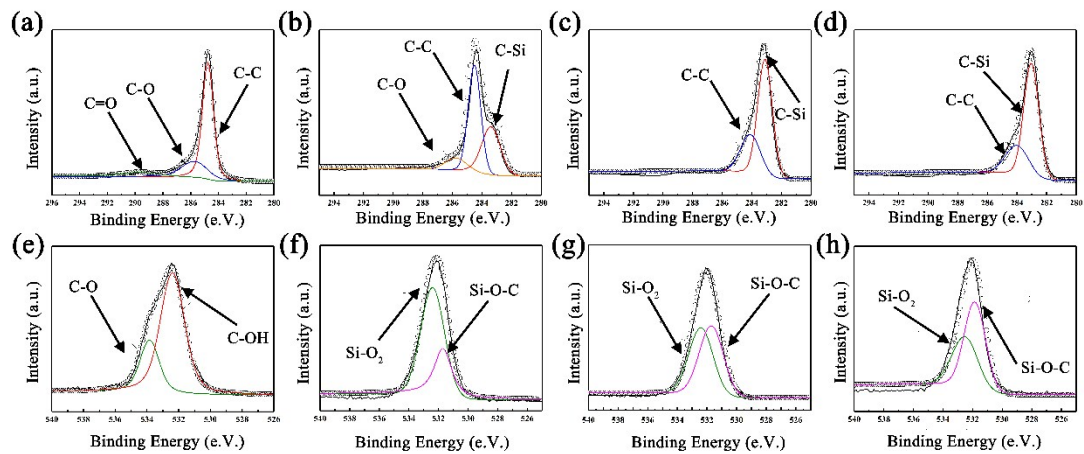

**Figure S6** High resolution (a)-(d)  $C_{1s}$  and (e)-(h)  $O_{1s}$  XPS peaks of SiC NSs heated at 1400 °C for (a) (e) 0.5 h, (b) (f) 1.0 h, (c) (g) 2.0 h, (d) (h) 3.0 h.

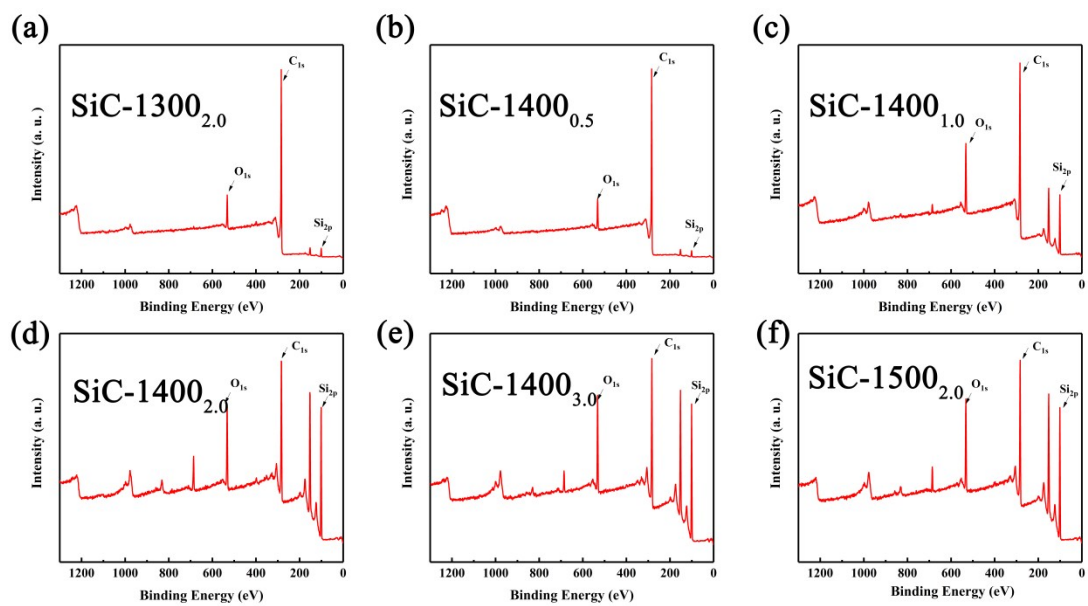

**Figure S7** XPS survey data of different SiC NSs samples.



**Table S1** Positions and FWHM of the deconvoluted Si<sub>2p</sub> peaks of samples containing SiC

| Sample                | SiC-1400 <sub>1.0</sub> | SiC-1400 <sub>2.0</sub> | SiC-1400 <sub>3.0</sub> | SiC-1500 <sub>2.0</sub> |
|-----------------------|-------------------------|-------------------------|-------------------------|-------------------------|
| Position of Si-C bond | 100.8 eV                | 100.9 eV                | 100.9 eV                | 101.0 eV                |
| FWHM of Si-C bond     | 1.22                    | 1.09                    | 1                       | 0.89                    |
| Position of Si-O bond | 101.7 eV                | 101.7 eV                | 101.7 eV                | 101.7 eV                |
| FWHM of Si-O bond     | 1.2                     | 1.1                     | 1.22                    | 1.22                    |

#### References:

- [1] F. Ténégal, A. Gheorghiu de la Rocque, G. Dufour, C. Sénémaud, B. Doucey, D. Bahloul-Hourlier, P. Goursat, M. Mayne and M. Cauchetier, *J. Electron Spectrosc. Relat. Phenom.*, 2000, **109**, 241-248.
- [2] S. Golczak, A. Kanciurzevska, M. Fahlman, K. Langer and J. J. Langer, *Solid State Ionics*, 2008, **179**, 2234-2239.
- [3] A. P. Dementjev, A. de Graaf, M. C. M can de Sanden, K. I. Maslakov, A. V. Naumkin and A. A. Serov, *Diamond Relat. Mater.*, 2000, **9**, 1904-1907.
- [4] B. Wang, Y. D. Wang, Y. P. Lei, S. Xie, N. Wu, Y. Z. Gou, C. Han, Q. Shi and D. Fang, *J. Mater. Chem. C*, 2016, **4**, 295-304.
